# Supplementary material for: Phylogeography and Ecological Niche Modeling of the Alashan Pit Viper (Gloydius cognatus; Reptilia, Viperidae) in Northwest China and Adjacent Areas
Source: MDPI journal article supplement (doi:10.3390/ani13233726), 2023-12-01
Supplement: s1 [file s1]

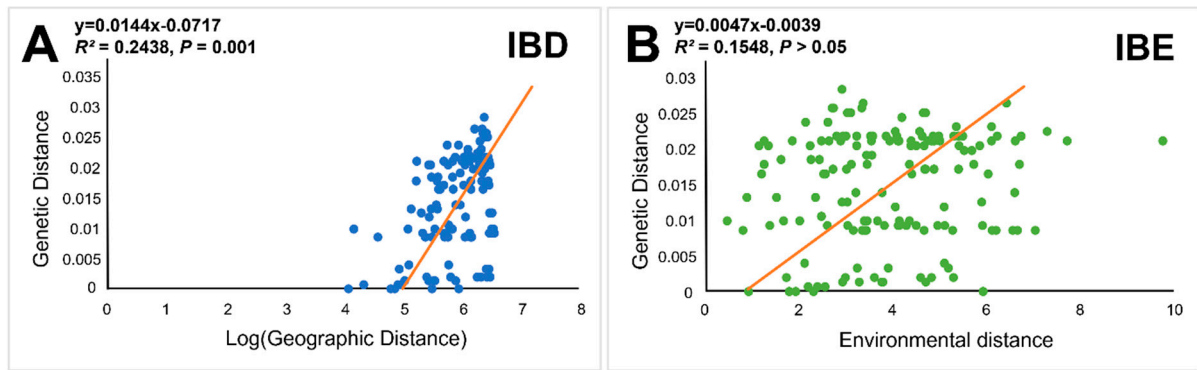

**Figure S1.** Results of the Mantel test of IBD (A) and IBE (B) analysis for all samples with precise location coordinates. Red lines show the trend of scatter plot.

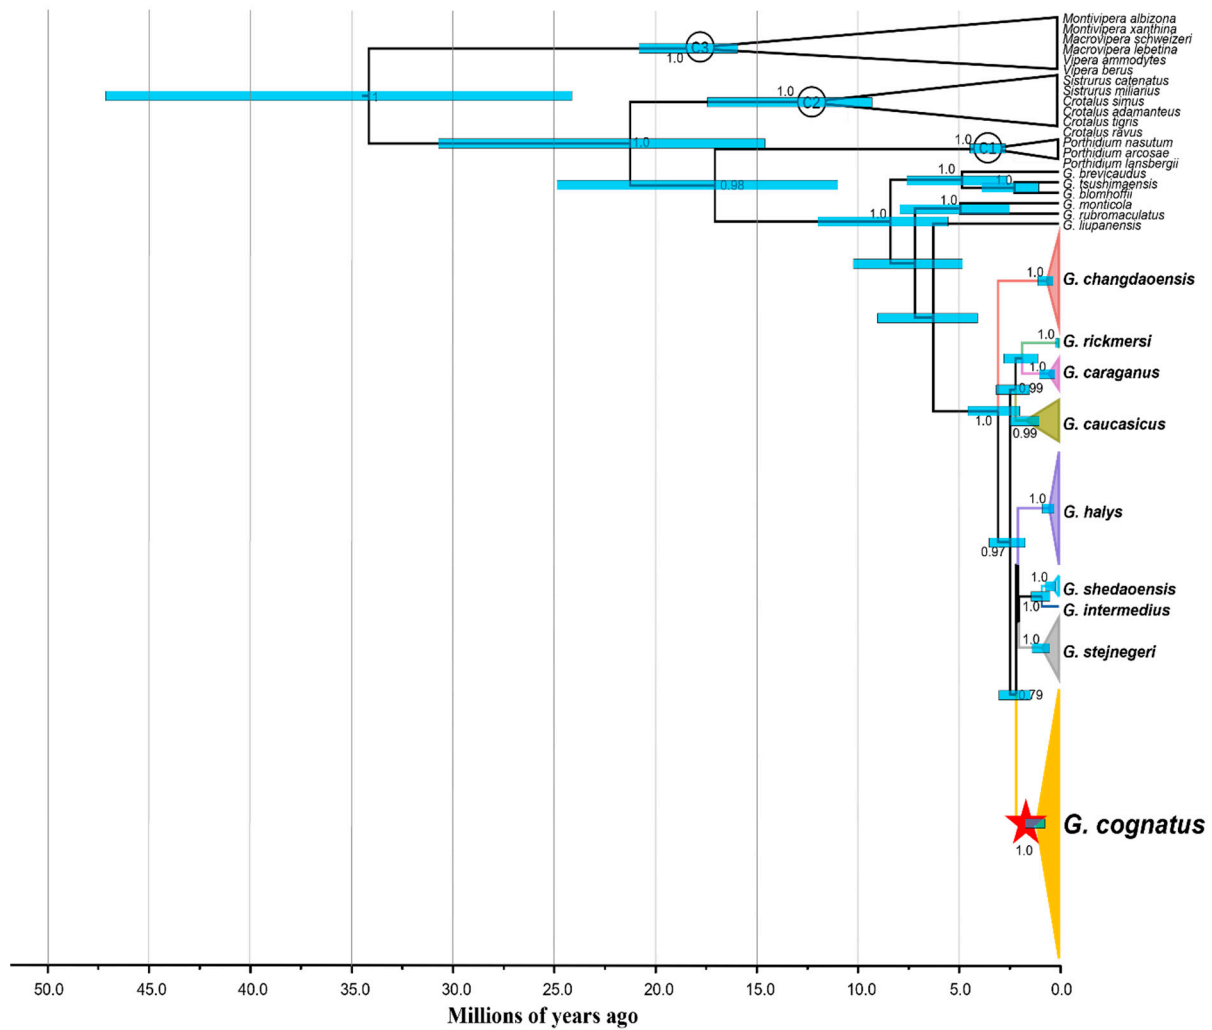

**Figure S2.** Molecular dating of the *G. halys*-*G. intermedius* complex based on the concatenated *ND4* and *Cytb* genes. Branch support values are not given for most intra-generic nodes to preserve clarity. C1, C2 and C3 indicate the calibration points placed on nodes, and red star denotes the node of *G. cognatus*, and bars show 95% HPD of divergence date.

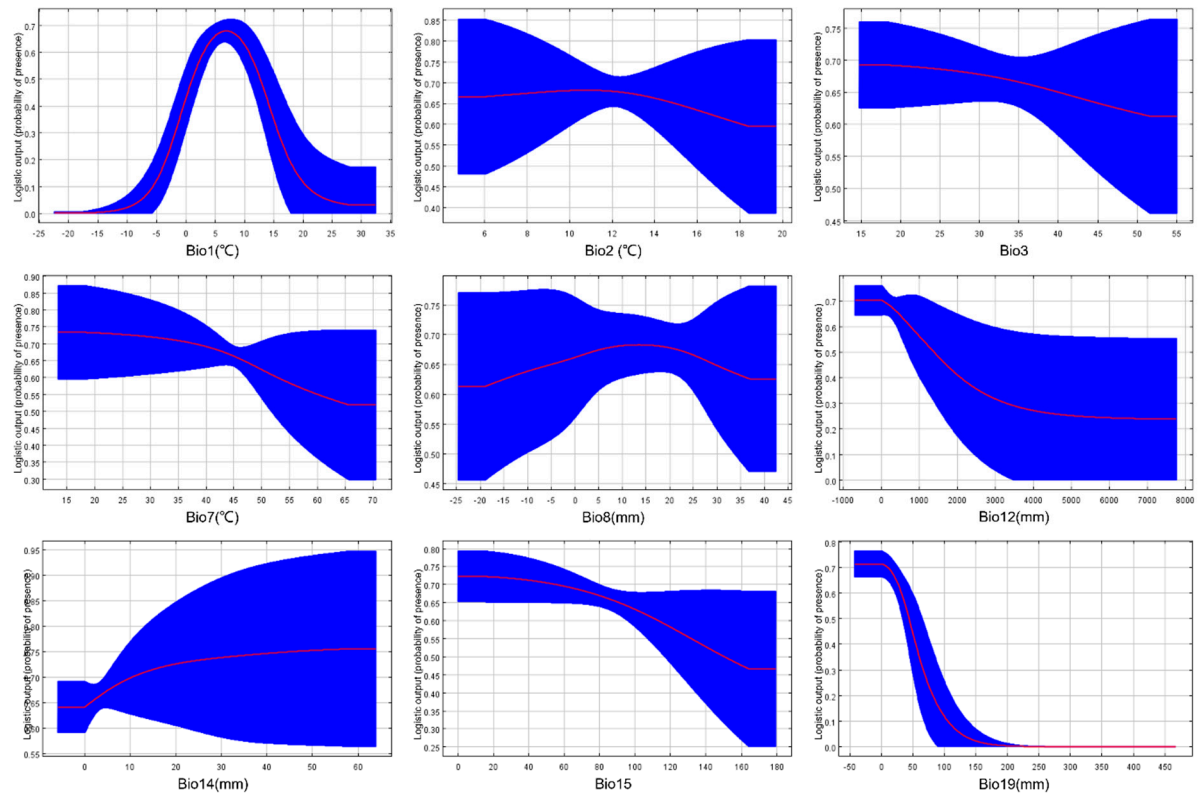

**Figure S3.** Average response curve profiles for the used variables in ENM.

**Table S1.** Samples information of the mtDNA data retrieved from GenBank.

| Species                 | Site Number | Voucher Number | Code     | Geographic Origin | Locality                                  | Accession Number |          | Reference                   |
|-------------------------|-------------|----------------|----------|-------------------|-------------------------------------------|------------------|----------|-----------------------------|
|                         |             |                |          |                   |                                           | ND4              | Cytb     |                             |
| <i>G. cognatus</i>      | 13          | GS070801       | GS070801 | Qaidam Basin      | Delingha, Qinghai, China                  | KX063784         | KX063811 | [42]                        |
|                         | 14          | CIBQY224       | QY224    | Zoige Basin       | Zoige, Sichuan, China                     | KY040640         | KY040619 | [43]                        |
|                         | 14          | CIBQY225       | QY225    | Zoige Basin       | Zoige, Sichuan, China                     | KY040641         | KY040620 | [43]                        |
|                         | 15          | JS130947       | 47       | Loess Plateau     | Yinchuan, Ningxia, China                  | KY040643         | KY040622 | [43]                        |
|                         | 16          | JSSD1505N2     | JSN2     | Loess Plateau     | Wuzhong, Ningxia, China                   | KX063781         | KX063808 | [42]                        |
|                         | 16          | JSSD1505N6     | JSN6     | Loess Plateau     | Wuzhong, Ningxia, China                   | KX063782         | KX063809 | [42]                        |
|                         | 17          | JS15100005     | 05       | Lanzhou Basin     | Gansu, China                              | KX063787         | KX063814 | [42]                        |
|                         | 18          | BYEB1501       | IA       | Mongolian Plateau | Baotou, Inner Mongolia, China             | KX063785         | KX063812 | [42]                        |
|                         | 19          | JSSD13109I1    | I1       | Mongolian Plateau | Sonid Right Banner, Inner Mongolia, China | KX063783         | KX063810 | [42]                        |
|                         | 20          | JSSD13109I3    | I3       | Mongolian Plateau | Inner Mongolia, China                     | KY040642         | KY040621 | [43]                        |
|                         | 21          | CHS098         | CHS098   | Mongolian Plateau | Inner Mongolia, China                     | –                | MK201265 | [56]                        |
|                         | 22          | GP188          | GP188    | Ily Basin         | Xinjiang, China                           | JQ687469         | JQ687488 | [55]                        |
|                         | 23          | DLG21          | G21      | Ily Basin         | Xinjiang, China                           | KX063786         | KX063813 | [42]                        |
|                         | 24          | CHS825         | CHS825   | Junggar Basin     | Bole, Xinjiang, China                     | –                | MK201554 | [56]                        |
| <i>G. halys</i>         |             | GP465          | GP465    |                   | Xinjiang, China                           | JQ687475         | JQ687494 | [46]                        |
|                         |             | JS1607H9       | H9       |                   | Heilongjiang, China                       | KY040639         | KY040618 | [42]                        |
|                         |             | SYNU1510151    | H2       |                   | Tahe, Heilongjiang, China                 | KX063773         | KX063800 | [42]                        |
|                         |             | SYNU1510154    | H8       |                   | Huma, Heilongjiang, China                 | KX063774         | KX063801 | [42]                        |
|                         |             | SYNU1301908    | 46       |                   | Lingyuan, Liaoning, China                 | KX063775         | KX063802 | [42]                        |
|                         |             | JSSD1508X3     | X3       |                   | Xilinhot, Inner Mongolia, China           | KX063776         | KX063803 | [42]                        |
|                         |             | JSSD140M1      | M1       |                   | Sunwu, Heilongjiang, China                | KX063777         | KX063804 | [42]                        |
|                         |             | DLG11          | G11      |                   | Xinglong, Hebei, China                    | KX063778         | KX063805 | [42]                        |
|                         |             | DLG12          | G12      |                   | Chifeng, Inner Mongolia, China            | KX063779         | KX063806 | [42]                        |
|                         |             | DLHSG50        | G50      |                   | Kazakhstan                                | KX063780         | KX063807 | [42]                        |
| <i>G. stejnegeri</i>    |             | SYNU1510145    | 53       |                   | Mentougou, Beijing, China                 | KX063788         | KX063815 | [42]                        |
|                         |             | SYNU1510134    | S1       |                   | Baoji, Shaanxi, China                     | KX063789         | KX063816 | [42]                        |
|                         |             | JSSD1409S3     | S3       |                   | Tongchuan, Shaanxi, China                 | KX063790         | KX063817 | [42]                        |
|                         |             | JSSD1508S4     | S4       |                   | Linfen, Shanxi, China                     | KX063791         | KX063818 | [42]                        |
|                         |             | JS151054       | 54       |                   | Beijing, China                            | KY040646         | KY040625 | [43]                        |
|                         |             | CHS323         | CHS323   |                   | Nanniwan, Shaanxi, China                  | –                | MK201393 | [56]                        |
|                         |             | CHS322         | CHS322   |                   | Yan'an, Shaanxi, China                    | –                | MK201392 | [56]                        |
|                         |             |                | KM434236 |                   | Heilongjiang, China                       | KM434236         | KM434236 | Xu and Zhao (Unpubl.) [112] |
|                         |             | NIBR0000625204 | NIBR     |                   | Gangwondo, South Korea                    | MW143075         | MW143075 | [112]                       |
|                         |             | JSSD1110D2     | D2       |                   | Lvshun, Liaoning, China                   | KX063792         | KX063819 | [42]                        |
| <i>G. shedaoensis</i>   |             | 1102           | 1102     |                   | Changdao, Shandong, China                 | KT726956         | KT726956 | [113]                       |
|                         |             | 1119           | 1119     |                   | Weihai, Shandong, China                   | KT726957         | KT726957 | [113]                       |
|                         |             | JSSD1110Q8     | Q8       |                   | Pulandian, Liaoning, China                | KX063793         | KX063820 | [42]                        |
| <i>G. qianshanensis</i> |             | JSSD1408Z1     | Z1       |                   | Lianyungang, Jiangsu, China               | KX063794         | KX063821 | [42]                        |
|                         |             | JSSD1510Z2     | Z2       |                   | Lianyungang, Jiangsu, China               | KX063795         | KX063822 | [42]                        |

|                               |                |         |                                 |          |          |                     |
|-------------------------------|----------------|---------|---------------------------------|----------|----------|---------------------|
|                               | JSSD1510C1     | C1      | Changdao, Shandong, China       | KX063796 | KX063823 | [42]                |
|                               | SYNU1510149_27 | 27      | Weihai, Shandong, China         | KX063797 | KX063824 | [42]                |
| <i>G. lijianlii</i>           | HS11047        | HS11047 | Xiadao, Shandong, China         | KF997956 | KF997904 | Huang (Unpubl.)     |
|                               | HS11048        | HS11048 | Xiaoheishandao, Shandong, China | KF997959 | KF997905 | Huang (Unpubl.)     |
|                               | HS11052        | HS11052 | Miaodao, Shandong, China        | KF997960 | KF997906 | Huang (Unpubl.)     |
|                               | CHS084         | CHS084  | Yantai, Shandong, China         | –        | MK201256 | [56]                |
|                               | CHS085         | CHS085  | Yantai, Shandong, China         | –        | MK201257 | [56]                |
|                               | CHS326         | CHS326  | Jia Island, Shandong, China     | –        | MK201394 | [56]                |
| <i>G. caraganus</i>           | JS1610CR2      | CR2     |                                 | MF490454 | MF490456 | [43]                |
|                               | JS1610CR1      | CR1     |                                 | MF490453 | MF490455 | [43]                |
|                               | RIZ20426.1     | 426     | Kyzylorda, Kazakhstan           | MZ959158 | MZ959165 | [114]               |
| <i>G. caucasicus</i>          | JS-2313        | JS2313  | Tajikistan                      | KY040656 | KY040637 | Shi (Unpubl.)       |
|                               | RIZ29913       | 913     | Mazandaran, Iran                | MZ959159 | MZ959166 | [114]               |
|                               | NEZMUT_1297    | NE97    | Alborz, Iran                    | MH378764 | MH378727 | [33]                |
|                               | NEZMUT_1299    | NE99    | Alborz, Iran                    | MH378765 | MH378728 | [33]                |
|                               | NEZMUT_61      | NE61    | Alborz, Iran                    | MH378729 | MH378692 | [33]                |
| <i>G. rickmersi</i>           | MHNG 2752.69   | R1      | Kyrgyzstan                      | KM078592 | –        | [43]                |
|                               | MHNG 2752.70   | R2      | Kyrgyzstan                      | KM096379 | –        | [43]                |
| <i>G. monticola</i>           | GY001          | GY001   | Lijiang, Yunnan, China          | JX661243 | JX661200 | Wu et al. (Unpubl.) |
| <i>G. liupanensis</i>         | DLG5           | G5      | Ningxia, China                  | KX063798 | KX063825 | [42]                |
| <i>G. brevicaudu</i>          | DW005          | DW005   | Yantai, Shandong, China         | JX661226 | JX661199 | Wu et al. (Unpubl.) |
| <i>G. rubromaculatus</i>      | Y2             | Y2      | Yushu, Qinghai, China           | KY040654 | KY040633 | [42]                |
| <i>G. blomhoffi</i>           | B524           | B524    | Japan                           | AY352814 | AY352751 | [115]               |
| <i>G. tsushimaensis</i>       | Ts1            | Ts1     | Japan                           | JN870211 | JN870203 | [116]               |
| <i>Sistrurus catenatus</i>    |                |         |                                 | AY223648 | AY223610 | [117]               |
| <i>Sistrurus miliarius</i>    |                |         |                                 | U41889   | AY223611 | [117,118]           |
| <i>Crotalus adamanteus</i>    |                |         |                                 | U41880   | AY223605 | [117,118]           |
| <i>Crotalus ravus</i>         |                |         |                                 | AY223647 | AY223609 | [119]               |
| <i>Crotalus simus</i>         |                |         |                                 | AY704885 | AY704835 | [120]               |
| <i>Crotalus tigris</i>        |                |         |                                 | AF156574 | AY223606 | [119,121]           |
| <i>Porthidium arcossae</i>    |                |         |                                 | AF292613 | AF292575 | [122]               |
| <i>Porthidium lansbergii</i>  |                |         |                                 | AF393623 | AY713375 | [122]               |
| <i>Porthidium nasutum</i>     |                |         |                                 | U41887   | AY223579 | [117,118]           |
| <i>Vipera berus</i>           |                |         |                                 | –        | DQ186079 | [123]               |
| <i>Vipera ammodytes</i>       |                |         |                                 | EU624232 | DQ186513 | [120,2]             |
| <i>Macrovipera lebetina</i>   |                |         |                                 | –        | KJ415301 | [124]               |
| <i>Macrovipera schweizeri</i> |                |         |                                 | –        | AJ275715 | [125]               |
| <i>Montivipera albizona</i>   |                |         |                                 | –        | KX168728 | [126]               |
| <i>Montivipera xanthina</i>   |                |         |                                 | –        | KX168811 | [126]               |

## References

2. Ursenbacher, S.; Schweiger, S.; Tomović, L.; Crnobrnja-Isailović, J.; Fumagalli, L.; Mayer, W. Molecular phylogeography of the nose-horned viper (*Vipera ammodytes*, Linnaeus (1758)): evidence for high genetic diversity and multiple refugia in the Balkan peninsula. *Mol. Phylogenet. Evol.* **2008**, *46*, 1116–1128. doi:10.1016/j.ympev.2007.11.002.
33. Asadi, A.; Montgelard, C.; Nazarizadeh, M.; Moghaddasi, A.; Fatemizadeh, F.; Simonov, E.; Kami, H.G.; Kaboli, M. Evolutionary history and postglacial colonization of an Asian pit viper (*Gloydius halys caucasicus*) into Transcaucasia revealed by phylogenetic and phylogeographic analyses. *Sci. Rep.* **2019**, *9*, 1224. doi:10.378/s41598-018-37558-8.
37. Wagner, P.; Tiutenko, A.; Mazepa, G.; Borkin, L.J.; Simonov, E. Alai! Alai! - a new species of the *Gloydius halys* (Pallas, 1776) complex (Viperidae, Crotalinae), including a brief review of the complex. *Amphib. Reptil.* **2016**, *37*, 15–31. doi:10.1163/15685381-00003026.

42. Shi, J.S.; Yang, D.W.; Zhang, W.Y.; Qi, S.; Li, P.P.; Ding, L. Distribution and intraspecies taxonomy of *Gloydius halys*-*Gloydius intermedius* complex in China (Serpentes: Crotalinae). *Chin. J. Zool.* **2016**, *51*, 777–798. doi:10.13859/j.cjz.201605008 (In Chinese with English abstract).
43. Shi, J.; Wang, G.; Fang, Y.; Ding, L.; Huang, S.; Hou, M.; Liu, J.; Li, P. A new moth-preying alpine pit viper species from Qinghai-Tibetan Plateau (Viperidae, Crotalinae). *Amphib. Reptil.* **2017**, *38*, 517–532. doi:10.1163/15685381-00003134.
55. Xu, Y.; Liu, Q.; Myers, E.A.; Wang, L.; Huang, S.; He, Y.; Peng, P.; Guo, P. Molecular phylogeny of the genus *Gloydius* (Serpentes: Crotalinae). *Asian Herpetol. Res.* **2012**, *3*, 127–132. doi:10.3724/SP.J.1245.2012.00127.
56. Li, J.N.; Liang, D.; Wang, Y.Y.; Guo, P.; Huang, S.; Zhang, P. A large-scale systematic framework of Chinese snakes based on a unified multilocus marker system. *Mol. Phylogenet. Evol.* **2020**, *148*, 106807. doi:10.1016/j.ympev.2020.106807.
112. Lee, Y.S.; Do, M.S.; Jeon, H.S.; Lee, S.C.; An, J. Complete mitochondrial genome of *Gloydius saxatilis* (Viperidae: crotalinae) from Korea. *Mitochondrial DNA B* **2021**, *6*, 645–647. doi:10.1080/23802359.2021.1878957.
113. Liu, Q.; Zhu, F.; Wang, X.; Xiao, R.; Fang, M.; Sun, L.; Li, P.; Guo, P. The complete mitochondrial genome sequence of *Gloydius shedaoensis* (Squamata: Viperidae). *Mitochondrial DNA A* **2016**, *27*, 4679–4680. doi:10.3109/19401736.2015.1106499.
114. Shi, J.S.; Liu, J.C.; Giri, R.; Owens, J.B.; Santra, V.; Kuttalam, S.; Selvan, M.; Guo, K.J.; Malhotra, A. Molecular phylogenetic analysis of the genus *Gloydius* (Squamata, Viperidae, Crotalinae), with description of two new alpine species from Qinghai-Tibet Plateau, China. *ZooKeys*, **2021**, *1061*, 87. doi:10.3897/zookeys.1061.70420.
115. Malhotra, A.; Thorpe, R.S. A phylogeny of four mitochondrial gene regions suggests a revised taxonomy for Asian pitvipers (*Trimeresurus* and *Ovophis*). *Mol. Phylogenet. Evol.* **2004**, *32*, 83–100. doi:10.1016/j.ympev.2004.02.008.
116. Fenwick, A.M.; Greene, H. W.; Parkinson, C.L. The serpent and the egg: unidirectional evolution of reproductive mode in vipers? *J. Zoolog. Syst. Evol. Res.* **2012**, *50*, 59–66. doi:10.1111/j.1439-0469.2011.00646.x.
117. Parkinson, C.L.; Campbell, J.A.; Chippindale, P.T.; Schuett, G. Multigene phylogenetic analysis of pitvipers, with comments on their biogeography. In: Schuett, G.W.; Höggren, M.; M.E.; Greene, H.W. (Eds.). *Biology of the Vipers*; Eagle Mountain Publishing, Eagle Mountain, UT, 2002; pp. 93–110.
118. Kraus, F.; Mink, D.G.; Brown, W.M. Crotaline intergeneric relationships based on mitochondrial DNA sequence data. *Copeia* **1996**, *1996*, 763–773. doi: 10.2307/1447637.
119. Wüster, W.; Ferguson, J.E.; Quijada-Mascareñas, J.A.; Pook, C.E.; Salomão M.D.G.; Thorpe, R. S. Tracing an invasion: landbridges, refugia, and the phylogeography of the Neotropical rattlesnake (Serpentes: Viperidae: *Crotalus durissus*). *Mol. Ecol.* **2005**, *14*, 1095–1108. doi:10.1111/j.1365-294X.2005.02471.x.
120. Wüster, W.; Peppin, L.; Pook, C.E.; Walker, D.E. A nesting of vipers: phylogeny and historical biogeography of the Viperidae (Squamata: Serpentes). *Mol. Phylogenet. Evol.* **2008**, *49*, 445–459. doi:10.1016/j.ympev.2008.08.019.
121. Parkinson, C.L.; Zamudio, K.R.; Greene, H.W. Phylogeography of the pitviper clade *Agkistrodon*: historical ecology, species status, and conservation of cantils. *Mol. Ecol.* **2000**, *9*, 411–420. doi:10.1046/j.1365-294x.2000.00854.x.
122. Wüster, W.; Salomão, M.D.G.; Quijada-Mascareñas, J.A.; Thorpe, R.S.; Duckett, G.J.; Puerto, M.G.; Theakston, R.D.G.; Thorpe, R.S.; Warrell, D.A. Origins and evolution of the South American pitviper fauna: Evidence from mitochondrial DNA sequence analysis. In: Schuett, G.W.; Höggren, M.; M.E.; Greene, H.W. (Eds.). *Biology of the Vipers*; Eagle Mountain Publishing, Eagle Mountain, UT, 2002; pp. 111–128.
123. Ursenbacher, S.; Carlsson, M.; Helfer, V.; Tegelström, H.; Fumagalli, L. Phylogeography and Pleistocene refugia of the adder (*Vipera berus*) as inferred from mitochondrial DNA sequence data. *Mol. Ecol.* **2006**, *15*, 3425–3437. doi:10.1111/j.1365-294X.2006.03031.x.
124. Zinenko, O.; Stümpel, N.; Mazanaeva, L.; Bakiev, A.; Shiryaev, K.; Pavlov, A.; Kotenko, T.; Kukushkin, O.; Chikin, Y.; Duisebayeva, T.; Nilson, G.; Orlov, N.L.; Tuniyev, S.; Ananjeva, N.B.; Murphy, R.W.; Joger, U. Mitochondrial phylogeny shows multiple independent ecological transitions and northern dispersion despite of Pleistocene glaciations in meadow and steppe vipers (*Vipera ursinii* and *Vipera renardi*). *Mol. Phylogenet. Evol.* **2015**, *84*, 85–100. doi:10.1016/j.ympev.2014.12.005.
125. Lenk, P.; Kalyabina, S.; Wink, M.; Joger, U. Evolutionary relationships among the true vipers (Reptilia: Viperidae) inferred from mitochondrial DNA sequences. *Mol. Phylogenet. Evol.* **2001**, *19*, 94–104. doi:10.1006/mpev.2001.0912.
126. Stümpel, N.; Rajabizadeh, M.; Avci, A.; Wüster, W.; Joger, U. Phylogeny and diversification of mountain vipers (*Montivipera*, Nilson et al., 2001) triggered by multiple Plio-Pleistocene refugia and high-mountain topography in the Near and Middle East. *Mol. Phylogenet. Evol.* **2016**, *101*, 336–351. doi:10.1016/j.ympev.2016.04.025.

**Table S2.** Data on the phylogenetic, molecular dating and BSP analyses, including partitions, models and parameters.

| Analysis                                       | Software | Dataset                                                                           | Best model | Partition identity                                                   | Length (bp) | Clock model                    | Tree model (linked)                            | Run specifications                                                          |
|------------------------------------------------|----------|-----------------------------------------------------------------------------------|------------|----------------------------------------------------------------------|-------------|--------------------------------|------------------------------------------------|-----------------------------------------------------------------------------|
| Phylogenetic analysis: Bayesian Inference      | MrBayes  | All sequences in <i>G. cognatus</i> and two outgroups                             | TRN+I+G    | <i>ND4</i> -1st, <i>ND4</i> -2nd, <i>Cytb</i> -1st, <i>Cytb</i> -2nd | 1194        |                                |                                                | 2 runs; 2×10 <sup>7</sup> generations; 1000 sampling frequency; 25% burn-in |
|                                                |          |                                                                                   | GTR+G      | <i>ND4</i> -3rd, <i>Cytb</i> -3rd                                    | 597         |                                |                                                |                                                                             |
| Phylogenetic analysis: Maximum Likelihood      | IQ-TREE  | All sequences in <i>G. cognatus</i> and two outgroups                             | TRN+I+G    | <i>ND4</i> -1st, <i>ND4</i> -2nd, <i>Cytb</i> -1st, <i>Cytb</i> -2nd | 1194        |                                |                                                | Ultrafast-bootstrap (UFBoot) ×10,000                                        |
|                                                |          |                                                                                   | GTR+G      | <i>ND4</i> -3rd, <i>Cytb</i> -3rd                                    | 597         |                                |                                                |                                                                             |
| Molecular dating with calibration points       | BEAST    | All sequences of <i>G. halys</i> - <i>G. intermedius</i> complex and 21 outgroups | TRN+I+G    | <i>ND4</i> -1st, <i>ND4</i> -2nd, <i>Cytb</i> -1st, <i>Cytb</i> -2nd | 1194        | Relaxed Uncorrelated Lognormal | Birth-and-death Random starting tree           | 2 runs; 4×10 <sup>7</sup> generations; 1000 sampling frequency; 25% burn-in |
|                                                |          |                                                                                   | GTR+G      | <i>ND4</i> -3rd, <i>Cytb</i> -3rd                                    | 597         |                                |                                                |                                                                             |
| Molecular dating with constant-size tree prior | BEAST    | All sequences in <i>G. cognatus</i>                                               | TRN+I+G    | <i>ND4</i> -1st, <i>ND4</i> -2nd, <i>Cytb</i> -1st, <i>Cytb</i> -2nd | 1194        | Relaxed Uncorrelated Lognormal | Constant-size Coalescence Random starting tree | 2 runs; 1×10 <sup>7</sup> generations; 1000 sampling frequency; 25% burn-in |
|                                                |          |                                                                                   | GTR+G      | <i>ND4</i> -3rd, <i>Cytb</i> -3rd                                    | 597         |                                |                                                |                                                                             |

|              |       |                              |         |                                                                               |      |              |                                                           |                                                                              |
|--------------|-------|------------------------------|---------|-------------------------------------------------------------------------------|------|--------------|-----------------------------------------------------------|------------------------------------------------------------------------------|
| BSP analysis | BEAST | All sequences in South Clade | TRN+I+G | <i>ND4</i> -1st,<br><i>ND4</i> -2nd,<br><i>Cytb</i> -1st,<br><i>Cytb</i> -2nd | 1194 | Strict clock | Coalescent: Bayesian Skyline Plot<br>Random starting tree | 2 runs; $4 \times 10^7$ generations; 5000<br>sampling frequency; 25% burn-in |
|              |       |                              | GTR+G   | <i>ND4</i> -3rd,<br><i>Cytb</i> -3rd                                          | 597  |              |                                                           |                                                                              |
| BSP analysis | BEAST | All sequences in North Clade | TRN+I+G | <i>ND4</i> -1st,<br><i>ND4</i> -2nd,<br><i>Cytb</i> -1st,<br><i>Cytb</i> -2nd | 1194 | Strict clock | Coalescent: Bayesian Skyline Plot<br>Random starting tree | 2 runs; $4 \times 10^7$ generations; 5000<br>sampling frequency; 25% burn-in |
|              |       |                              | GTR+G   | <i>ND4</i> -3rd,<br><i>Cytb</i> -3rd                                          | 597  |              |                                                           |                                                                              |



**Table S3.** The 18 sampling sites used for IBD and IBE analysis.

| <b>Site Number</b> | <b>Voucher Number</b> | <b>Location</b>                              | <b>Latitude (N)</b> | <b>Longitude (E)</b> |
|--------------------|-----------------------|----------------------------------------------|---------------------|----------------------|
| 1                  | KZ26                  | Raiymbek District, Almaty Region, Kazakhstan | 43.16               | 79.21                |
| 2                  | KZ08                  | Raiymbek District, Almaty Region, Kazakhstan | 42.97               | 79.31                |
| 3                  | CKG041                | Raiymbek District, Almaty Region, Kazakhstan | 43.02               | 79.89                |
| 4                  | CKG036                | Uygur District, Almaty Region, Kazakhstan    | 43.43               | 80.07                |
| 5                  | XU202105              | Gongliu County, Xinjiang, China              | 43.26               | 82.09                |
| 6                  | Guo4708               | Nilka County, Xinjiang                       | 43.8                | 82.43                |
| 7                  | Guo2481               | Wusu City, Xinjiang, China                   | 45.05               | 84.66                |
| 8                  | GXG310                | Hoboksar, Xinjiang, China                    | 46.58               | 85.65                |
| 9                  | GXG807                | Tsalar, Uvs, Mongolia                        | 49.37               | 92.93                |
| 10                 | Guo5242               | Yongdeng County, Gansu, China                | 36.49               | 103.4                |
| 11                 | Guo2707               | Jingyuan County, Gansu, China                | 36.55               | 104.68               |
| 12                 | Guo875                | Otog Banner, Inner Mongolia, China           | 38.79               | 107.34               |
| 13                 | GS070801              | Delingha City, Qinghai, China                | 37.38               | 97.40                |
| 13                 | GS070802              | Delingha City, Qinghai, China                | 37.38               | 97.40                |
| 14                 | CIBQY224              | Zoige, Sichuan, China                        | 33.60               | 102.93               |
| 14                 | CIBQY225              | Zoige, Sichuan, China                        | 33.60               | 102.93               |
| 15                 | JS130947              | Yinchuan, Ningxia, China                     | 38.48               | 106.21               |
| 16                 | JSSD1505N2            | Wuzhong, Ningxia, China                      | 38.00               | 106.19               |
| 16                 | JSSD1505N6            | Wuzhong, Ningxia, China                      | 38.00               | 106.19               |
| 18                 | BYEB1501              | Baotou, Inner Mongolia, China                | 40.48               | 109.84               |
| 19                 | JSSD1310911           | Sonid Right Banner, Inner Mongolia, China    | 42.74               | 112.62               |

**Table S4.** Locations and coordinates used for ENM.

| Location                                     | Latitude | Longitude | Reference  | Year      |
|----------------------------------------------|----------|-----------|------------|-----------|
| Raiymbek District, Almaty Region, Kazakhstan | 43.16    | 79.21     | This study | 2013      |
| Raiymbek District, Almaty Region, Kazakhstan | 42.97    | 79.31     | This study | 2013      |
| Raiymbek District, Almaty Region, Kazakhstan | 43.02    | 79.89     | This study | 2017      |
| Uygur District, Almaty Region, Kazakhstan    | 43.43    | 80.07     | This study | 2017      |
| Gongliu County, Xinjiang, China              | 43.26    | 82.09     | This study | 2021      |
| Nilka County, Xinjiang                       | 43.80    | 82.43     | This study | 2015      |
| Wusu City, Xinjiang, China                   | 45.05    | 84.66     | This study | 2013      |
| Hoboksar, Xinjiang, China                    | 46.58    | 85.65     | This study | 2019      |
| Ts Algar, Uvs, Mongolia                      | 49.37    | 92.93     | This study | 2019      |
| Yongdeng County, Gansu, China                | 36.49    | 103.40    | This study | 2016      |
| Jingyuan County, Gansu, China                | 36.55    | 104.68    | This study | 2013      |
| Otog Banner, Inner Mongolia, China           | 38.79    | 107.34    | This study | 2010      |
| Delingha City, Qinghai, China                | 37.38    | 97.40     | This study | 2007      |
| Zoige, Sichuan, China                        | 33.60    | 102.93    | [43]       | 2017      |
| Yinchuan, Ningxia, China                     | 38.48    | 106.21    | [43]       | 2017      |
| Wuzhong, Ningxia, China                      | 38.00    | 106.19    | [42]       | 2016      |
| Baotou, Inner Mongolia, China                | 40.48    | 109.84    | [42]       | 2016      |
| Sonid Right Banner, Inner Mongolia, China    | 42.74    | 112.62    | [42]       | 2016      |
| Qinghe County, Xinjiang, China               | 46.41    | 90.61     | This study | 2022/2023 |

## References

42. Shi, J.S.; Yang, D.W.; Zhang, W.Y.; Qi, S.; Li, P.P.; Ding, L. Distribution and intraspecies taxonomy of *Gloydus halys*-*Gloydus intermedius* complex in China (Serpentes: Crotalinae). *Chin. J. Zool.* **2016**, *51*, 777–798. doi:10.13859/j.cjz.201605008 (In Chinese with English abstract).
43. Shi, J.; Wang, G.; Fang, Y.; Ding, L.; Huang, S.; Hou, M.; Liu, J.; Li, P. A new moth-preying alpine pit viper species from Qinghai-Tibetan Plateau (Viperidae, Crotalinae). *Amphib. Reptil.* **2017**, *38*, 517–532. doi:10.1163/15685381-00003134.

**Table S5.** Uncorrelated climatic factors used in ENM and their contribution rates.

| <b>ID</b> | <b>Environment Variable</b>                          | <b>Contribution Rates</b> | <b>Permutation Importance</b> |
|-----------|------------------------------------------------------|---------------------------|-------------------------------|
| Bio1      | Annul mean temperature                               | 55.8±18.05                | 43.8±13.45                    |
| Bio2      | Mean diurnal range                                   | 2.5±2.61                  | 2.1±3.17                      |
| Bio3      | Isothermality                                        | 1.6±4.46                  | 0.4±1.27                      |
| Bio7      | Temperature annual range                             | 2.0±3.30                  | 3.7±5.82                      |
| Bio8      | Mean temperature of wettest quarter                  | 2.6±4.99                  | 0.7±1.68                      |
| Bio12     | Annual precipitation                                 | 1.2±2.80                  | 3.7±5.43                      |
| Bio14     | Precipitation of driest month                        | 0.4±0.74                  | 2.6±4.14                      |
| Bio15     | Precipitation seasonality (coefficient of variation) | 4.7±5.80                  | 4.5±5.35                      |
| Bio19     | Precipitation of coldest quarter                     | 29.2±12.83                | 38.5±10.52                    |

**Table S6.** Hierarchical analysis of AMOVA for *G. cognatus*.

| Hypothesized<br>Structure | Among Groups |       |                      | Among Populations Within<br>Groups |       |                      | Within Populations |      |                      |
|---------------------------|--------------|-------|----------------------|------------------------------------|-------|----------------------|--------------------|------|----------------------|
|                           | <i>df</i>    | %var  | <i>Fct (P-value)</i> | <i>df</i>                          | %var  | <i>Fsc (P-value)</i> | <i>df</i>          | %var | <i>Fst (P-value)</i> |
| (N1, N2) vs. (S1, S2)     | 1            | 55.92 | 0.55919**            | 16                                 | 41.98 | 0.95242              | 3                  | 2.1  | 0.97903**            |
| N1 vs. N2 vs. S1 vs. S2   | 3            | 74.57 | 0.74565**            | 14                                 | 23.03 | 0.97598*             | 3                  | 2.40 | 0.97598**            |

Significance level: 0.01\*; 0.001\*\*
